# Supplementary material
Source: PubMed Central journal article supplement (PMC6391874)
Supplement: NIHMS1007060-supplement-Supp_Table.pdf [file NIHMS1007060-supplement-Supp_Table.pdf]

**Supplementary Table 1: List of primers for bisulfite pyrosequencing and genotyping.**

| <i>FKBP5</i>      | PCR Primers                                                                                                                                   | Pyrosequencing Primers                                                                                                                                    |
|-------------------|-----------------------------------------------------------------------------------------------------------------------------------------------|-----------------------------------------------------------------------------------------------------------------------------------------------------------|
| Intron 1          | 5'-GTAGTTTATGTTTTAGTTAAATTAGGTT-3'<br>5'-CCATTACAAATTCCTTACACTTTTTA-3'<br>5'-AATTTTGATTTTTTATTTGTAGGTT-3'*<br>5'-AAACAAAACATAAACCTTACTCTA-3'  | 5'-AAATCTTTTAAACCTAACAAAC-3'<br>5'-ATAATCTTATAAATCTCTTACAA-3'                                                                                             |
| Intron 2 Region 1 | 5'-GGTTTAAATGTTTTATATTTTGATAGTA-3'<br>5'-CTTTACTTAACTTCTTTTTAAATA-3'<br>5'-GTTTTGTAGTTTAGGTTGGAGTGAATG-3'<br>5'-AAAATCCACCATTCTTTCTAATCT-3'*  | 5'-GGTTGGAGTGTAATGGTA-3'<br>5'-GAGTAGTTGGGATTATAGG-3'<br>5'-ATTATGTTGGTTAGGTTGGTT-3'<br>5'-GATTATAAGTATGAGTTA-3'                                          |
| Intron 2 Region 2 | 5'-GAGTAGTAGAGATTATAGGTATATGT-3'<br>5'-ATAACTCTCTAACTCTCTAATAACC-3'<br>5'-GTTGGTTTGGAAATTTTGGATTTAATG-3'<br>5'-ATTCATCCACATACCCAATTA-3'*      | 5'-TGGAAATTTTGGATTTTAAATGA-3'<br>5'-TGAGATTATTGGTATAAGTT-3'<br>5'-GATATTATATAATATTTTATAAGTGT-3'<br>5'-GAGGTTATGTTTAAATTGTAAGTT-3'                         |
| Intron 2 Region 3 | 5'-GTGTTAATAATGGTGTAGGAGAAATAAT-3'<br>5'-CCTTTTACTATACCTTTTTCTATA-3'<br>5'-TAAGATGGAAGAATTAAGAGATGT-3'<br>5'-TTACCTACAATATTCATAACAATAACAC-3'* | 5'-AGAAATAAAATAAAAGAAATGT-3'<br>5'-GAAATATATAGTTATGTA-3'<br>5'-ATAGGGATATGTTTTGAGAAATGTG-3'<br>5'-GTAGAGTGTATTTATATAAATTTAGATGG-3'                        |
| Intron 2 Region 4 | 5'-AAGTAAGATATTTTTAAGAGGAA-3'<br>5'-TATAATCTCAACTCACTACAACCT-3'<br>5'-AAGAGGAAATAGTAAAAGATATTTTATTG-3'*<br>5'-CCTCCTAAATCAAACAATTCTACC-3'     | 5'-TCTACCTCAACCTCC-3'<br>5'-ACTCCTAACCTCAAATAATC-3'<br>5'-TTACAAACATAAACCAC-3'                                                                            |
| Intron 5          | 5'-GGTAGAGAAAGAAATAAATAAGTTA-3'<br>5'-TTCTTACATTTTCATTTTACTACTA-3'<br>5'-AAGATTATGTAATTTAAAGGGGGAGGG-3'*<br>5'-CTCTCTTTCTTTTTCCCCCTAT-3'      | 5'-TCTTTCTTTTTTCCCCCTATT-3'<br>5'-CAATTTAAATAATTTTTACAAC-3'                                                                                               |
| Intron 7          | 5'-AGAGTGAAATTGAGATGGAAATATGT-3'<br>5'-AATTTCTTCTCCATCCACTTCTATA-3'<br>5'-AGGAGGTATGTTGTTTTTGGAAATTAAG-3'<br>5'-AATTTATCTTACCTCCAACACT-3'*    | 5'-GGAGAAGTATAAAAAAAAAAATGG-3'<br>5'-GTTATAGAGTTTAGTGGTTT-3'<br>5'-GGAGTTATAGTGTAGGTTTT-3'<br>5'-TTAAGGAGTTATTTGGTGA-3'<br>5'-TGATATATAGGAATAAATAAGAAT-3' |
| Rs1360780         | 5'-CAATTCACATATATTCAGAAGAGATC-3'<br>5'-CAGCAGTAGCAAGTAAGAATT-3'*                                                                              | 5'-AAGGCTTTCACATAAGCAAAGTTA-3'                                                                                                                            |

Primers for each pyrosequencing assay consist of two outside PCR primers and two nested primers. One of the nested primers is biotin-labeled and HPLC purified (HPLC/Biotin) to allow isolation of DNA for subsequent pyrosequencing steps.

CpG methylation for each assay is determined by the use of several pyrosequencing extension primers (Pyro primers) that are provided below the two pairs of PCR primers. The sequence read for each pyro primer is also provided on the right side. The genotyping primers for the SNP rs1360780 consist of two PCR primers that will amplify a 90bp amplicon. Genotyping is performed using the pyro primer and the PyroMarkMD feature of the pyrosequencing machine.

**Supplementary Table 1**

\*Biotinylated and HPLC-purified primer.
